# Supplementary material for: Evolutionary Insights Into Two Widespread Ectomycorrhizal Fungi (Pisolithus) From Comparative Analysis of Mitochondrial Genomes
Source: Front Microbiol. 2021 Jul 5;12:583129. doi: 10.3389/fmicb.2021.583129 (PMC8287656; doi:10.3389/fmicb.2021.583129)
Supplement: Supplementary file 1 [file Table_1.XLSX]

## Sheet: Table S1
Table S1 Comparison on mitogenomes between 8 Boletales species
Item	Pisolithus microcarpus	Pisolithus tinctorius	Rhizopogon salebrosus	Rhizopogon vinicolor	Paxillus involutus	Paxillus rubicundulus	Coniophora olivacea	Coniophora puteana
Life-style	Ectomycorrhizal						Saprophytic
Order	Boletales	Boletales	Boletales	Boletales	Boletales	Boletales	Boletales	Boletales
Family	Pisolithaceae	Pisolithaceae	Suillineae	Suillineae	Paxilineae	Paxilineae	Coniophorineae	Coniophorineae
Accession number	MT577034	MT577035	MH794152	MH794153	MK993563	MK993564	MT375015	MT375016
Genome size (bp)	43990	44054	66704	77109	39109	41061	78350	79655
GC content (%)	23.34	22.18	21.45	21.46	21.75	21.02	27.32	27.61
AT skew	-0.021	-0.013	-0.027	-0.027	-0.086	-0.089	-0.016	-0.012
GC skew	0.078	0.492	0.063	0.083	0.06	0.051	0.024	0.036
No. of PCGs (non-intronic ORFs)	20	19	24	22	18	17	30	38
Plasmid-derived genes	0	2	3	2	0	1	7	7
PCGs with unknown functions	5	2	6	5	3	1	8	16
No. of introns	4	3	16	24	4	5	33	13
Intronic ORFs	5	3	10	19	1	0	10	12
No. of rRNA genes	2	2	2	2	2	2	2	2
No. of tRNA genes	26	25	25	25	25	25	29	27
Intra-genomic repeats	0.0011	0.0032	0	0.0301	0.0313	0.0325	0.0706	0.1007
Protein coding region (bp)	18444 (41.93%)	19338 (43.90%)	22605 (33.89%)	19665 (25.50%)	17052 (43.60%)	16803 (40.92%)	29235 (37.31%)	39381 (49.44%)
Intronic region (bp)	5924 (13.47%)	3700 (8.40%)	17735 (26.59%)	31620 (41.01%)	2790 (7.13%)	2499 (6.09%)	27620 (35.25%)	17856 (22.42%)
RNA region (bp)	7935 (18.04%)	7378 (16.75%)	7787 (11.67%)	7784 (10.09%)	7972 (20.38%)	7969 (19.41%)	6961 (8.88%)	6802 (8.54%)
Intergenic region (bp)	11687 (26.57%)	13638 (30.96%)	18577 (27.85%)	18040 (23.40%)	11295 (28.88%)	13790 (33.58%)	14534 (18.55%)	15616 (19.60%)

## Sheet: Table S2
Table S2 Characterization of the two Pisolithus mitogenomes
Pisolithus microcarpus							Pisolithus tinctorius
Gene	Start	Stop	Length	Strand	Intergenic nucleotides (bp)	Notes	Gene	Start	Stop	Length	Strand	Intergenic nucleotides (bp)	Notes
orf351	610	1665	1056	+		LAGLIDADG endonuclease	orf349	235	1284	1050	+		LAGLIDADG endonuclease
orf229	2060	2749	690	+		hypothetical protein	orf325	2115	3092	978	+		LAGLIDADG endonuclease
orf280	3448	4290	843	+		GIY-YIG endonuclease	cox1	1	4022	4022	+	318
cox1	1	4878	4878	+	274		exon1	1	234	234	+
exon1	1	609	609	+			exon2	1635	2114	480	+
exon2	2758	3447	690	+			exon3	3153	4022	870	+
exon3	4594	4878	285	+			intron1	235	1634	1400	+		Group IB
intron1	610	2757	2148	+		Group IB	intron2	2115	3152	1038	+		Group IB
intron2	3448	4593	1146	+		Group IA	atp6	4341	5114	774	+	996
atp6	5153	5926	774	+	1008		trnM(cat)	6111	6181	71	+	115
trnM(cat)	6935	7005	71	+	114		trnH(gtg)	6297	6370	74	+	773
trnH(gtg)	7120	7193	74	+	276		rnl	7144	10671	3528	+	670
rnl	7470	11478	4009	+	308		cox2	11342	12097	756	+	225
trnI(tat)	11787	11871	85	+	278		trnA(tgc)	12323	12394	72	+	39
cox2	12150	12905	756	+	248		trnF(gaa)	12434	12505	72	+	13
trnA(tgc)	13154	13225	72	+	36		trnT(tgt)	12519	12590	72	+	69
trnF(gaa)	13262	13333	72	+	10		trnQ(ttg)	12660	12733	74	+	141
trnT(tgt)	13344	13415	72	+	102		trnK(ttt)	12875	12946	72	+	414
trnQ(ttg)	13518	13591	74	+	73		rps3	13361	14710	1350	+	662
trnK(ttt)	13665	13736	72	+	371		nad6	15373	15984	612	+	341
rps3	14108	15445	1338	+	653		nad2	16326	17957	1632	+	-1
nad6	16099	16710	612	+	287		nad3	17957	18316	360	+	165
nad2	16998	18629	1632	+	-1		trnY(gta)	18482	18565	84	+	65
nad3	18629	18988	360	+	152		trnM(cat)	18631	18704	74	+	34
trnY(gta)	19141	19224	84	+	87		trnS(tga)	18739	18824	86	+	112
trnM(cat)	19312	19385	74	+	34		rns	18937	20913	1977	+	148
trnS(tga)	19420	19505	86	+	117		trnV(tac)	21062	21132	71	+	523
rns	19623	21591	1969	+	139		trnL(tag)	21656	21740	85	+	106
trnV(tac)	21731	21801	71	+	618		trnR(tcg)	21847	21920	74	+	62
trnL(tag)	22420	22504	85	+	171		trnC(gca)	22058	21983	76	-	418
trnR(tcg)	22676	22749	74	+	41		atp8	22477	22635	159	+	112
trnC(gca)	22866	22791	76	-	364		trnW(cca)	22748	22820	73	+	134
atp8	23231	23389	159	+	111		trnD(gtc)	22955	23027	73	+	675
trnW(cca)	23501	23572	72	+	154		orf105	23703	24020	318	+	682	hypothetical protein
trnD(gtc)	23727	23799	73	+	352		orf384	25857	24703	1155	-	401	DNA polymerase
orf153	24613	24152	462	-	359	hypothetical protein	atp9	26259	26480	222	+	117
orf174	24973	25497	525	+	88	hypothetical protein	trnG(tcc)	26598	26669	72	+	71
orf318	25586	26542	957	+	295	hypothetical protein	trnR(tct)	26741	26811	71	+	267
orf105	26838	27155	318	+	773	hypothetical protein	orf397	27079	28272	1194	+	2041	RNA polymerase
atp9	27929	28150	222	+	97		nad1	30314	31327	1014	+	324
trnG(tcc)	28248	28319	72	+	67		trnI(gat)	31652	31722	71	+	300
trnR(tct)	28387	28457	71	+	305		orf265	32452	33249	798	+		LAGLIDADG endonuclease
nad1	28763	29776	1014	+	389		cob	32023	34442	2420	+	309
trnI(gat)	30166	30236	71	+	302		exon1	32023	32451	429	+
orf330	30932	31924	993	+		GIY-YIG endonuclease	exon2	33714	34442	729	+
orf265	32337	33134	798	+		LAGLIDADG endonuclease	intron1	32452	33713	1262	+		Group ID
cob	30539	34326	3788	+	392		cox3	34752	35561	810	+	11
exon1	30539	30931	393	+			orf844	35573	38107	2535	+	326	hypothetical protein
exon2	32301	32336	36	+			nad4L	38434	38700	267	+	1
exon3	33598	34326	729	+			nad5	38702	40687	1986	+	193
intron1	30932	32300	1369	+		Group ID	nad4	40881	42332	1452	+	802
intron2	32337	33597	1261	+		Group ID	trnP(tgg)	43135	43208	74	+	37
cox3	34719	35528	810	+	11		trnN(gtt)	43246	43318	73	+	61
orf685	35540	37597	2058	+	357	hypothetical protein	trnL(taa)	43380	43464	85	+	33
nad4L	37955	38221	267	+	1		trnM(cat)	43498	43569	72	+	88
nad5	38223	40208	1986	+	200		trnE(ttc)	43658	43728	71	+	78
nad4	40409	41860	1452	+	1216		trnS(gct)	43807	43887	81	+	167
trnP(tgg)	43077	43150	74	+	30
trnN(gtt)	43181	43253	73	+	59
trnL(taa)	43313	43397	85	+	56
trnM(cat)	43454	43525	72	+	81
trnE(ttc)	43607	43677	71	+	88
trnS(gct)	43766	43846	81	+	144

## Sheet: Table S3
Table S3 Local BLAST analysis of the Pisolithus mitogenomes against themselves
Species	Identitie (%)	Aligned length (bp)	Mismatched bases (bp)	Gaps (bp)	from	to	from	to	evalue
Pisolithus microcarpus	100	50	0	0	5180	5229	6000	6049	5.7e-19
Pisolithus microcarpus	100	50	0	0	6000	6049	5180	5229	5.7e-19
Pisolithus tinctorius	84.615	52	8	0	2703	2754	793	844	3.38e-09
Pisolithus tinctorius	84.615	52	8	0	793	844	2703	2754	3.38e-09
Pisolithus tinctorius	79.487	39	8	0	25298	25336	15610	15572	0.039
Pisolithus tinctorius	79.487	39	8	0	15610	15572	25298	25336	0.039

## Sheet: Table S4
Table S4 Tandem repeats detected in the mitogenomes of Pisolithus using the online program Tandem Repeats Finder
Species	Indices	Period Size	Copy Number	Consensus Size	Percent Matches	Percent Indels	Score	Entropy (0-2)	Repeat motif
Pisolithus microcarpus	2316--2360	21	2.1	22	84	12	58	1.91	AAGATGGAACTAATCCTTTTGA
Pisolithus microcarpus	6275--6322	25	1.9	25	86	0	69	1.39	TAATAAACTATAAAATTAATAAACA
Pisolithus microcarpus	8212--8252	14	2.9	15	85	10	59	1.13	ATAATAAATTAATCT
Pisolithus microcarpus	13435--13532	28	3.5	27	78	10	108	1.66	GAGTTATAGTTTAAATTATATTTTCAT
Pisolithus microcarpus	16863--16896	8	4.3	8	92	0	59	0.98	ATATATTT
Pisolithus microcarpus	17660--17701	21	2	21	81	9	50	1.37	AATTGTAATAGGATTATTATT
Pisolithus microcarpus	21926--21963	11	3.1	12	88	11	51	0.93	TATTTTTATAAT
Pisolithus microcarpus	21908--21961	27	1.9	29	81	7	67	1.26	TATTTTCTATACAGTATATATTATTAAAT
Pisolithus microcarpus	25132--25187	24	2.3	24	87	6	78	1.4	GAAATGAATATTAATAATAAACAA
Pisolithus microcarpus	25931--25973	18	2.4	18	96	0	77	1.48	GAAAATAAAAACACAGAT
Pisolithus microcarpus	27338--27399	17	3.6	17	91	2	97	1.33	AATTTATAAAATGGATA
Pisolithus microcarpus	37679--37703	13	1.9	13	100	0	50	0.72	AAAATATAAAAAT
Pisolithus microcarpus	37756--37835	20	4	20	82	12	110	1.41	ATAACTATATTCATAAATAA
Pisolithus microcarpus	43418--43448	12	2.7	12	95	5	55	0.71	AAAATAAATATA
Pisolithus tinctorius	1493--1539	12	3.9	12	100	0	94	1	AATTTAATTATA
Pisolithus tinctorius	4031--4083	23	2.4	21	76	17	54	1.19	TTATTTAATTAACAAATTAAT
Pisolithus tinctorius	7401--7448	13	3.5	13	83	13	60	1.12	TTAATAATTAATT
Pisolithus tinctorius	7418--7487	15	4.7	15	75	8	63	1.09	ATAATTAATTTTATT
Pisolithus tinctorius	10982--11027	15	3	15	87	3	65	1	TAATTATTTTTAAAA
Pisolithus tinctorius	11150--11183	7	4.9	7	88	0	50	1.16	TATAATA
Pisolithus tinctorius	12592--12649	28	2.1	27	87	3	80	1.73	ACTCATATTTAACGAGTTAAAGTTTAA
Pisolithus tinctorius	12990--13030	17	2.6	16	92	7	66	0.95	TATATAAAAATATTAA
Pisolithus tinctorius	12991--13038	17	3.2	15	88	11	64	0.94	ATATAAAAATATTAA
Pisolithus tinctorius	16037--16083	16	2.7	18	77	12	53	1.13	AATTATTATATTAATACA
Pisolithus tinctorius	16050--16161	49	2.3	51	79	14	123	1.25	ATATATATTATATTTTAAATACAAATATATAATATATATTAATATTGTTAT
Pisolithus tinctorius	16038--16181	48	3	46	77	16	127	1.24	ATTATATATTTTATATATATATTATTTTTAATAAAATAATAATATT
Pisolithus tinctorius	16243--16293	26	1.9	27	84	11	70	1.14	ATATAATAAATACAATAAAAAAAAATG
Pisolithus tinctorius	20994--21043	26	2	25	96	4	91	1.2	AATTTATTTATTTAAAAATTAAACA
Pisolithus tinctorius	21771--21831	25	2.5	26	81	7	74	1.17	ATAATAATATTTATTTATTATTAAAC
Pisolithus tinctorius	23414--23469	20	2.8	20	88	2	76	1.42	TAATGATATGAATAAAAATT
Pisolithus tinctorius	28506--28569	22	2.9	24	80	13	75	1.26	AAATAATATATAAATTAATATCTG
Pisolithus tinctorius	30282--30310	15	1.9	15	100	0	58	0.79	AAAAAATAATAAAAC
Pisolithus tinctorius	31902--31931	11	2.7	11	100	0	60	0.78	ATAAAAAATAT
Pisolithus tinctorius	31953--32022	7	9.3	8	76	11	51	0.9	AATATAAA
Pisolithus tinctorius	31964--32006	16	2.6	16	88	3	59	0.88	AAATTATAAATATAAA
Pisolithus tinctorius	35724--35762	19	2	20	85	5	53	0.99	AAAATAAAATTATTTAAATT
Pisolithus tinctorius	36202--36302	3	33.7	3	72	7	62	1.43	TAA
Pisolithus tinctorius	36202--36302	27	3.7	27	73	10	89	1.43	TAATAATAATATTAATAATAATGATAA
Pisolithus tinctorius	36205--36335	24	5.3	24	68	15	79	1.44	TAATAATATTAATAATAATAATAT
Pisolithus tinctorius	36186--36304	15	7.9	15	72	7	80	1.45	ATAATAATAATATTA
Pisolithus tinctorius	36351--36389	18	2.2	18	85	0	51	1.82	ATACTAATAATGAGAATG
Pisolithus tinctorius	36965--37060	24	4.1	21	69	22	59	1.53	AATAATTCATCTAATAATATT
Pisolithus tinctorius	38174--38230	22	2.7	20	76	15	60	1.2	AAAAATTAAAATTTTTATTT
Pisolithus tinctorius	38264--38307	16	2.8	16	86	13	72	0.94	AAATAAAAAAATTCAA
Pisolithus tinctorius	38278--38326	24	2	24	88	0	71	1	AAAAATAAAAATAATCAAAAATAA
Pisolithus tinctorius	38264--38310	8	5.9	8	75	9	51	0.9	AAATAAAA
Pisolithus tinctorius	38304--38346	16	2.7	16	89	7	61	1.19	AAATAAATATATTCAT
Pisolithus tinctorius	43093--43134	12	3.4	12	80	6	57	0.89	ATTAATATTTTT
Pisolithus tinctorius	43098--43132	6	5.7	6	86	6	52	0.78	TATTTT
Pisolithus tinctorius	43744--43783	12	3.1	14	80	20	52	1.22	AATTATATAGATAT

## Sheet: Table S5
Table S5 Local BLAST searches between the mitochondrial and nuclear genomes of the two Pisolithus species
Mitogenome	Nuclear Genome	Identity (%)	Alignment length (bp)	Mismatches (bp)	Gap (bp)	Mitogenome		Nuclear genome		Evalue
						From	To	From	To
Pisolithus microcarpus	KN834025.1	100	34	0	0	5187	5220	22002	22035	1.35e-07
Pisolithus microcarpus	KN834019.1	100	32	0	0	39174	39205	6340	6309	1.74e-06
Pisolithus microcarpus	KN833864.1	100	32	0	0	39174	39205	77478	77447	1.74e-06
Pisolithus microcarpus	KN833721.1	100	31	0	0	39175	39205	55634	55604	6.27e-06
Pisolithus tinctorius	KN832273.1	99.922	7709	6	0	10906	18614	7709	1	0
Pisolithus tinctorius	KN832344.1	99.786	3733	8	0	30726	34458	1	3733	0
Pisolithus tinctorius	KN832347.1	96.835	3697	60	18	36464	40105	3695	1	0
Pisolithus tinctorius	KN832360.1	99.289	3094	12	3	40107	43196	3088	1	0
Pisolithus tinctorius	KN832330.1	99.729	2586	5	2	20458	23043	1	2584	0
Pisolithus tinctorius	KN832367.1	99.685	2542	5	3	3738	6278	387	2926	0
Pisolithus tinctorius	KN832396.1	99.664	2381	7	1	26373	28752	1	2381	0
Pisolithus tinctorius	KN832426.1	99.717	2118	6	0	6263	8380	2118	1	0
Pisolithus tinctorius	KN832435.1	99.008	2017	17	1	34449	36462	1	2017	0
Pisolithus tinctorius	KN832438.1	98.441	1988	20	6	28746	30724	3	1988	0
Pisolithus tinctorius	KN832420.1	97.958	1861	35	3	24513	26371	1860	1	0
Pisolithus tinctorius	KN832542.1	100	1186	0	0	18699	19884	1	1186	0
Pisolithus tinctorius	KN832551.1	99.817	1091	2	0	437	1527	1	1091	0
Pisolithus tinctorius	KN832545.1	100	401	0	0	3339	3739	1149	749	0
Pisolithus tinctorius	KN831951.1	99.237	131	1	0	31657	31787	954724	954594	1.01e-59
Pisolithus tinctorius	KN832025.1	99.029	103	1	0	35207	35309	196363	196261	3.7e-44
Pisolithus tinctorius	KN831952.1	95.604	91	4	0	37405	37495	886279	886189	1.74e-32
Pisolithus tinctorius	KN831952.1	100	32	0	0	39701	39732	917406	917437	2.34e-06
Pisolithus tinctorius	KN832056.1	93.103	87	4	2	16587	16671	39688	39602	2.27e-26
Pisolithus tinctorius	KN831967.1	100	33	0	0	14314	14346	85579	85611	6.5e-07
Pisolithus tinctorius	KN831979.1	100	32	0	0	34798	34829	26308	26277	2.34e-06
Pisolithus tinctorius	KN831962.1	100	31	0	0	34903	34933	428033	428063	8.41e-06

## Sheet: Table S6
Table S6 Species, and GenBank accession number used for phylogenetic analysis in this study
ID	Species	GenBank accession number	Genome size (bp)	NO. of introns	Order	Family
Apsi	Austropuccinia psidii	MN018834	93299	19	Pucciniales	Sphaerophragmiaceae
Pmei	Phakopsora meibomiae	GQ338834	32520	6		Phakopsoraceae
Ppac	Phakopsora pachyrhizi	GQ332420	31825	6
Abis	Agaricus bisporus	JX271275	135005	46	Agaricales	Agaricaceae
Ccin	Coprinopsis cinerea	NW_003307477	42448	0		Psathyrellaceae
Lame	Laccaria amethystina	MK697669	65156	8		Hydnangiaceae
Lbic	Laccaria bicolor	MK697670	95304	10
Ldec	Lyophyllum decastes	MH447974	50643	0		Lyophyllaceae
Lshi	Lyophyllum shimeji	MH447975	73678	10
Tmat	Tricholoma matsutake	JX985789	76037	10		Tricholomataceae
Abor	Armillaria borealis	MH407470	116433	30		Physalacriaceae
Asol	Armillaria solidipes	MH660713	103563	24
Dtab	Desarmillaria tabescens	MH823225	93439	16		Agaricales incertae sedis
Asin	Armillaria sinapina	MH282847	122167	32		Physalacriaceae
Fvel	Flammulina velutipes	JF799107	88395	10
Ledo	Lentinula edodes	AB697988	121394	19		Omphalotaceae
Mper	Moniliophthora perniciosa	AY376688	109103	14		Marasmiaceae
Mror	Moniliophthora roreri	HQ259115	93722	13
Scom	Schizophyllum commune	AF402141	49704	0		Schizophyllaceae
Pcit	Pleurotus citrinopileatus	MG017444	60694	3		Pleurotaceae
Pery	Pleurotus eryngii	KX827267	72650	10
Post	Pleurotus ostreatus	EF204913	73242	10
Ppla	Pleurotus platypus	MG017445	73807	10
Hrus	Hygrophorus russula	MH643589	55769	3		Hygrophoraceae
Coli	Coniophora olivacea	MT375015	39109	4	Boletales	Coniophorineae
Cput	Coniophora puteana	MT375016	41061	5
Rsal	Rhizopogon salebrosus	MH794152	66704	16		Rhizopogonaceae
Rvin	Rhizopogon vinicolor	MH794153	77109	24
Pmic	Pisolithus microcarpus	MT577034	43990	4		Pisolithaceae
Ptin	Pisolithus tinctorius	MT577035	44054	3
Pinv	Paxillus involutus	MK993563	39109	4		Paxillaceae
Prub	Paxillus rubicundulus	MK993564	41061	5
Hcor	Hericium coralloides	KY007042	72961	0	Russulales	Hericiaceae
Ldel	Lactarius deliciosus	MH319478	53895	4		Russulaceae
Lhat	Lactarius hatsudake	MH319475	46808	5
Lhyg	Lactarius hygrophoroides	MH319477	48541	4
Lpip	Lactarius piperatus	MH319479	60843	8
Lvol	Lactarius volemus	MH319474	38445	1
Rabi	Russula abietina	MH138073	67683	15
Rlep	Russula lepida	MH138075	56008	9
Rcom	Russula compacta	MH138072	69423	9
Rfoe	Russula foetens	MH138074	58585	13
Rvir	Russula virecsens	MH138076	48512	2
Hirr	Heterobasidion irregulare	KF957635	114193	27		Bondarzewiaceae
Fpal	Fomitopsis palustris	AP017926	63479	7	Polyporales	Fomitopsidaceae
Lsul	Laetiporus sulphureus	MG519331	101111	16		Laetiporaceae
Prad	Phlebia radiata	HE613568	156348	32		Meruliaceae
Gapp	Ganoderma applanatum	KR109212	119803	31		Polyporaceae
Gleu	Ganoderma leucocontextum	MH252534	88194	20
Gtsu	Ganoderma tsugae	MH252533	92511	24
Gcal	Ganoderma calidophilum	MH252535	124588	31
Gluc	Ganoderma lucidum	KC763799	60635	10
Gmer	Ganoderma meredithae	KP410262	78447	17
Gsin	Ganoderma sinense	KF673550	86451	30
Tcin	Trametes cingulata	GU723273	91500	27
Thir	Trametes hirsuta	MG775432	59039	9
Csul	Coniferiporia sulphurascens	MK623260	58959	1	Hymenochaetales	Hymenochaetaceae
Fmed	Fomitiporia mediterranea	MK623258	115036	28
Ssan	Sanghuangporus sanghuang	MG149786	112060	35
Plam	Phellinus lamaoensis	MK623259	45604	3
Spar	Schizopora paradoxa	MK623261	57732	8		Schizoporaceae
Tflo	Turbinellus floccosus	MN623377	62846	4	Gomphales	Gomphaceae
Capp	Cantharellus appalachiensis	MG602716	73562	20	Cantharellales	Cantharellaceae
Ccib	Cantharellus cibarius	KC573037	58656	13
Clut	Cantharellus lutescens	MG602719	80736	27
Rsol	Rhizoctonia solani	KC352446	235849	31		Ceratobasidiaceae
Cgat	Cryptococcus gattii	CP025773	31189	7	Tremellales	Cryptococcaceae
Cneo	Cryptococcus neoformans	AY101381	24874	2
Hory	Hannaella oryzae	MH732752	26444	6		Bulleribasidiaceae
Tfuc	Tremella fuciformis	MF422647	35058	5		Tremellaceae
Tasa	Trichosporon asahii	JH925097	32567	4	Trichosporonales	Trichosporonaceae
Mvio	Microbotryum cf. violaceum	KC285587	29999	2	Microbotryales	Microbotryaceae
Mlyc	Microbotryum lychnidis-dioicae	KC285586	177540	29
Rmuc	Rhodotorula mucilaginosa	MF694646	56814	12	Sporidiobolales	Sporidiobolaceae
Jang	Jaminaea angkorensis	KC628747	65147	10	Microstromatales	/
Ubro	Ustilago bromivora	LT558140	59352	8	Ustilaginales	Ustilaginaceae
Umay	Ustilago maydis	DQ157700	92107	16
Tind	Tilletia indica	DQ993184	107808	24	Tilletiales	Tilletiaceae
Twal	Tilletia walkeri	EF536375	47023	13
